# Supplementary material for: UBXN3B is crucial for B lymphopoiesis
Source: PubMed Central journal article supplement — eBioMedicine. 2024 Jul 16;106:105248. doi: 10.1016/j.ebiom.2024.105248 (PMC11287013; doi:10.1016/j.ebiom.2024.105248), 2024-07-16
Supplement: mmc1.pdf [file mmc1.pdf]

## **UBXN3B Is Crucial for B Lymphopoiesis**

Tingting Geng et al.

This file contains 15 supplemental figures and legends.

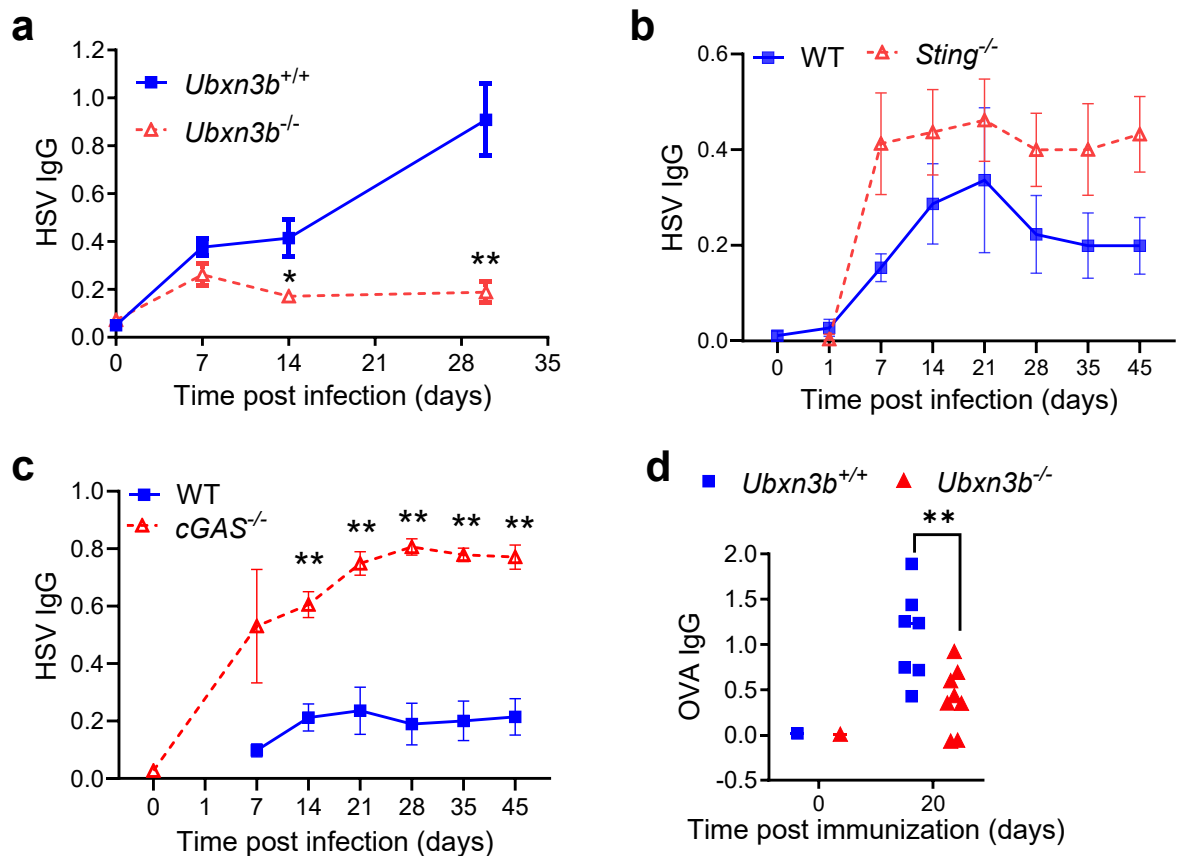

**Supplemental Fig.S1. UB3N3B is critical for the IgG response to viral infection and immunization.** **a-c)** Age and sex-matched mice were infected with  $1 \times 10^4$  plaque forming units (PFU) of HSV-1 virions intraperitoneally, or **d)** immunized with 10  $\mu$ g of chicken ovalbumin (OVA) twice. The serum HSV-1-or OVA-specific IgG were quantified by ELISA and presented as optical density O.D.<sub>450nm</sub>. In **a-c)**, data point: mean  $\pm$  S.E.M, N=6 for *Ubxn3b*<sup>+/+</sup> and *Ubxn3b*<sup>-/-</sup> respectively, N= 6 for WT and 5 for *Sting*<sup>-/-</sup> respectively, N=6 mice for WT and 3 for *cGas*<sup>-/-</sup> respectively. \* $p < 0.05$ , \*\* $p < 0.01$ , (repeated measures two-way ANOVA with Bonferroni's multiple comparisons test). In **d)**, each symbol=one animal, N=7 mice for days 24 p.i. \*\*  $p < 0.05$ , two tailed unpaired *t*-test.

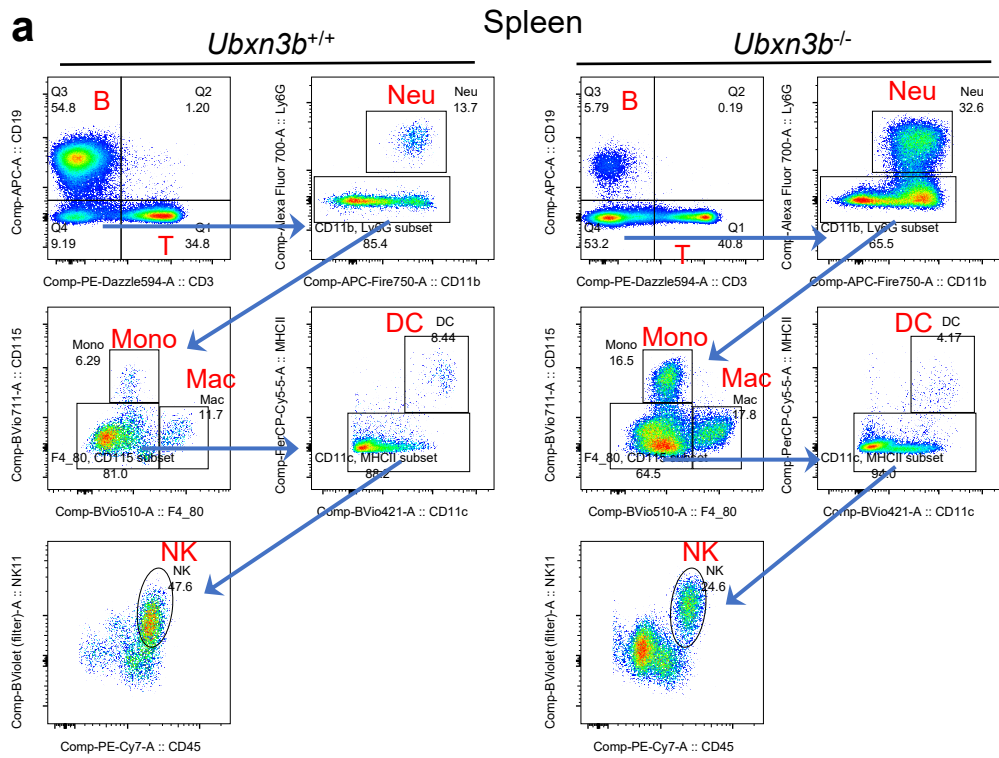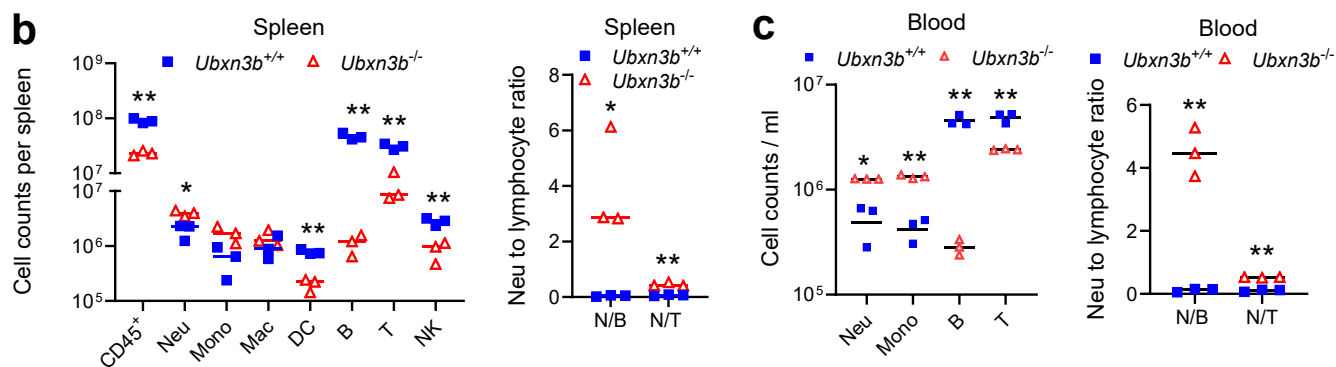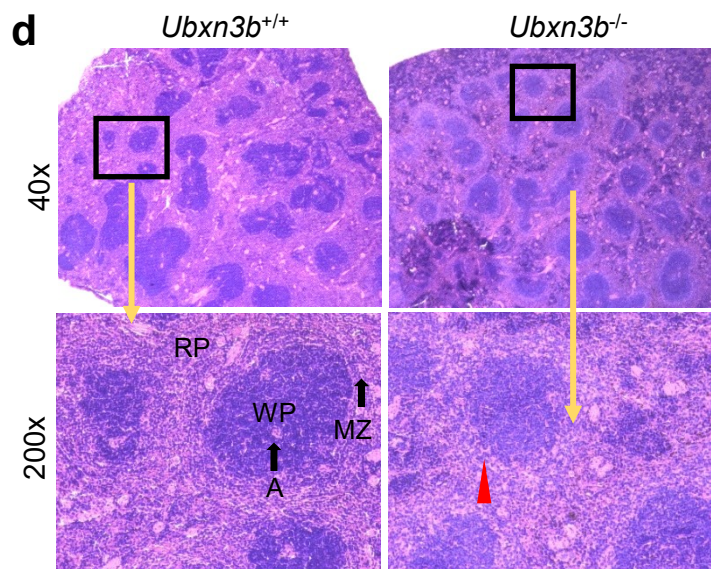

**Supplemental Fig.S2. UBXN3B is essential for the maintenance of peripheral B population.** **a)** The flow cytometry gating strategy. **b, c)** The cell counts of major immune cell populations and neutrophil to B/T ratios in **b)** spleen and **c)** blood of specific pathogen-free mouse littermates. Neu: neutrophil, Mac: macrophage, Mono: monocyte, DC: dendritic cell, NK: natural killer. Each symbol=one mouse. The horizontal line indicates the median of the result. \*  $p < 0.05$ ; \*\*  $p < 0.01$ . (multiple unpaired Welch  $t$ -tests with Holm-Šidák correction). **d)** Hematoxylin and eosin staining (H&E) staining of spleens. The red arrowhead indicates reduced cell density in the marginal zones of white pulps. WP: white pulp, RP: red pulp, A: central arteriole, MZ: marginal zone.

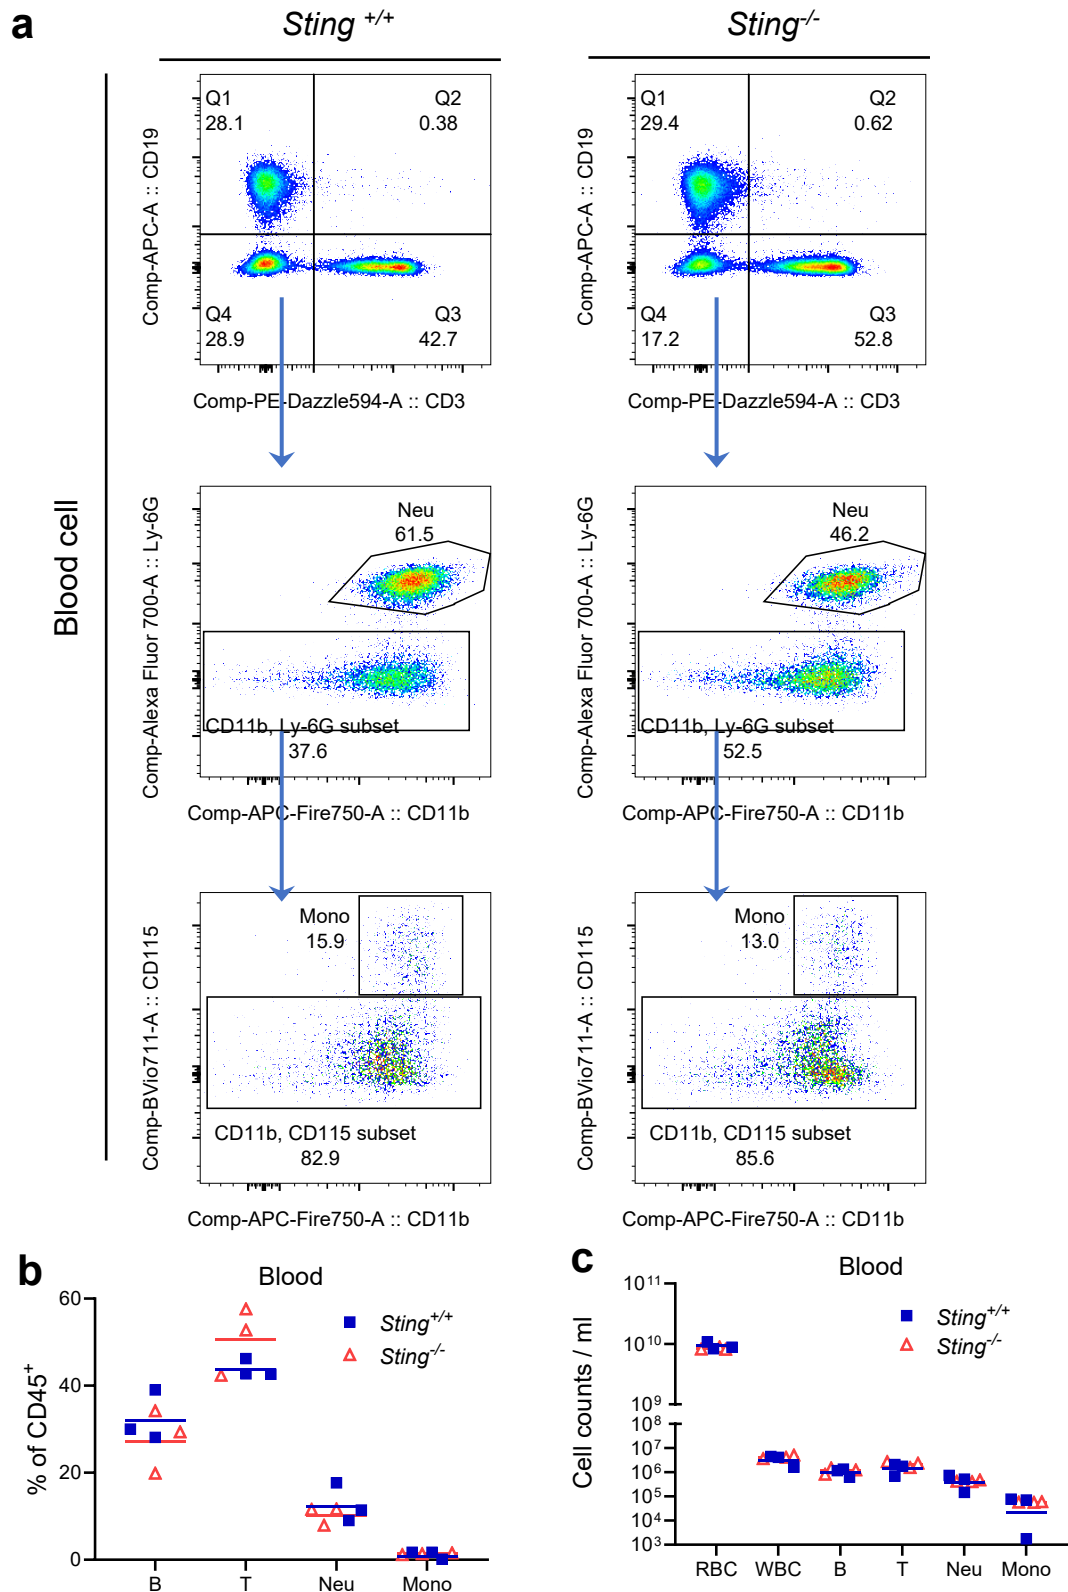

**Supplemental Fig.S3. STING is dispensable for steady-state hematopoietic homeostasis. a)**

The flow cytometry gating strategy, **b)** The percentage and **c)** counts of major blood cell types in *Sting*<sup>+/+</sup> and *Sting*<sup>-/-</sup> littermates, quantitated by flow cytometry. Each symbol=one animal. N=3 mice/genotype. The horizontal line indicate the mean of the results. RBC: red blood cell, WBC: white blood cell, CD19<sup>+</sup>: B cell, CD3<sup>+</sup>: T cell, Neu: neutrophil, Mono: monocyte. Multiple Unpaired Welch *t*-test was use for **b)** and **c)** with no significant difference.

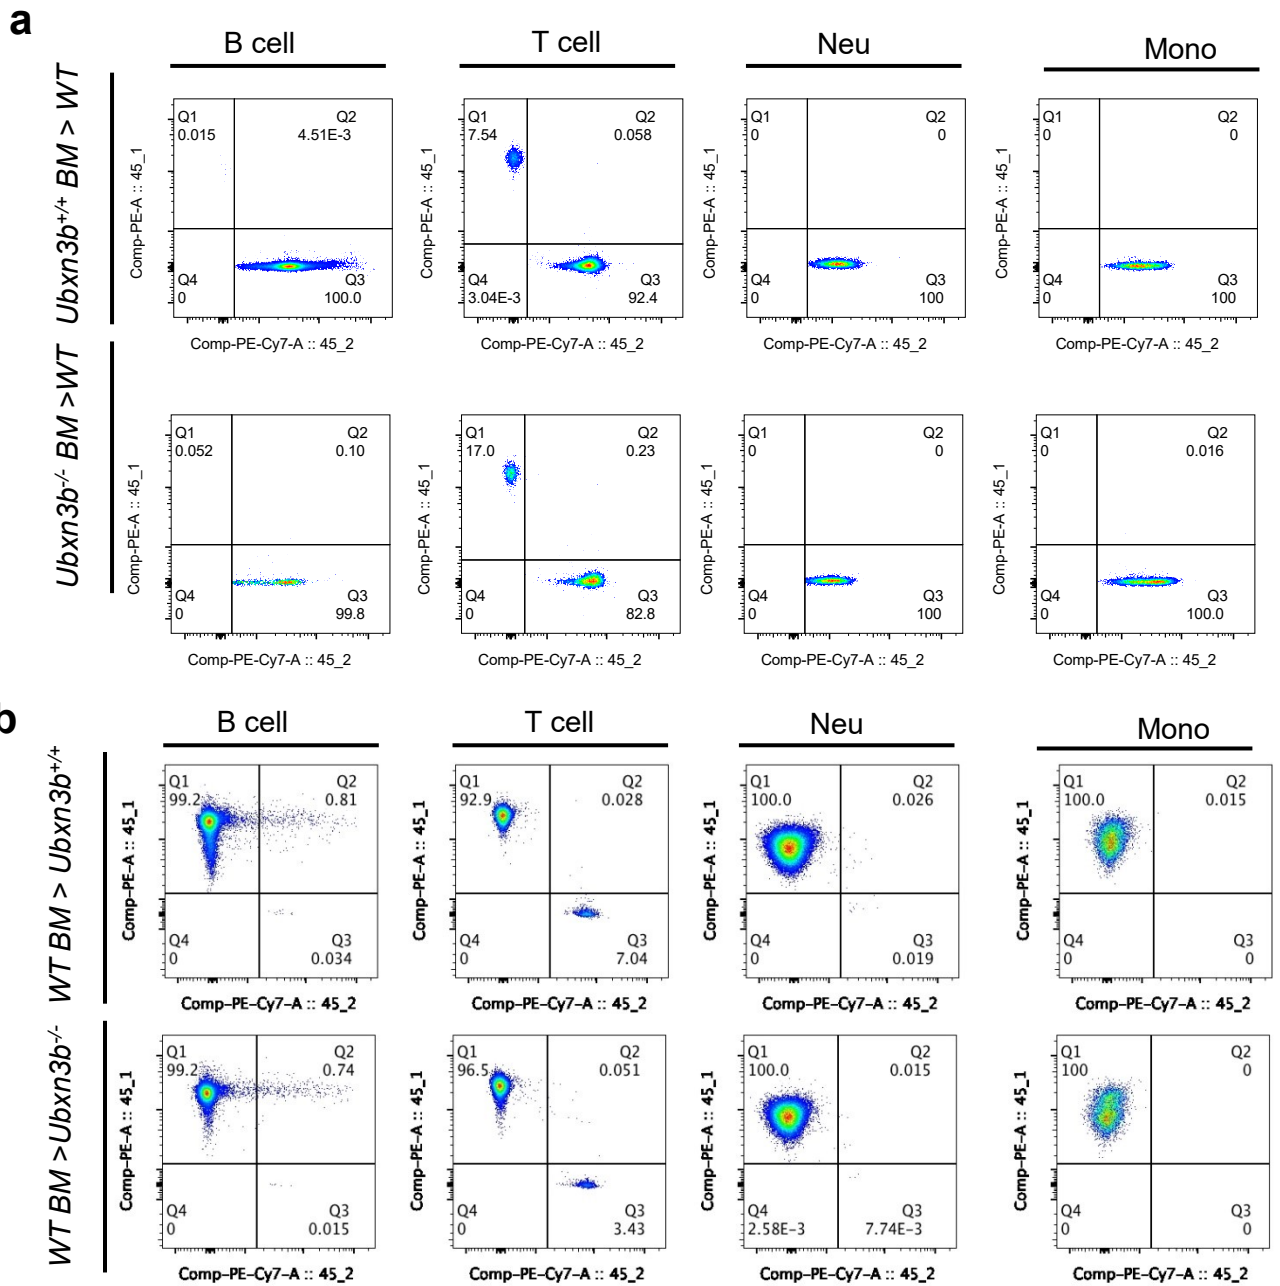

**Supplemental Fig.S4. The percentage of blood CD45.1 and CD45.2 cells 1.5 month after bone marrow transplantation (BMT). a** Irradiated wild type (WT, CD45.1) mice were transplanted with *Cre<sup>+</sup>Ubxn3b<sup>fl/fl</sup>* (CD45.2) bone marrow. The mice were then treated with tamoxifen (TMX) to delete *Ubxn3b* (designated *Ubxn3b<sup>-/-</sup>* BM–WT) or not (designated *Ubxn3b<sup>+/+</sup>* BM–WT) in hematopoietic cells. Over 99% B/Neu/Mono are CD45.2<sup>+</sup>, over 82% T cell are CD45.2<sup>+</sup>, indicating successful irradiation and reconstitution. **b** Irradiated *Cre<sup>+</sup>Ubxn3b<sup>fl/fl</sup>* and *Ubxn3b<sup>fl/fl</sup>* (CD45.2) mice were transplanted with wild type (WT, CD45.1) bone marrow. The mice were then treated with tamoxifen (TMX) to delete *Ubxn3b* (designated WT BM–*Ubxn3b<sup>-/-</sup>*) or not (designated WT BM–*Ubxn3b<sup>+/+</sup>*) in non-hematopoietic cells. Over 99% B/Neu/Mono are CD45.1<sup>+</sup>, over 92% T cell are CD45.1<sup>+</sup>, indicating successful irradiation and reconstitution. Neu: neutrophil, Mono: monocyte.

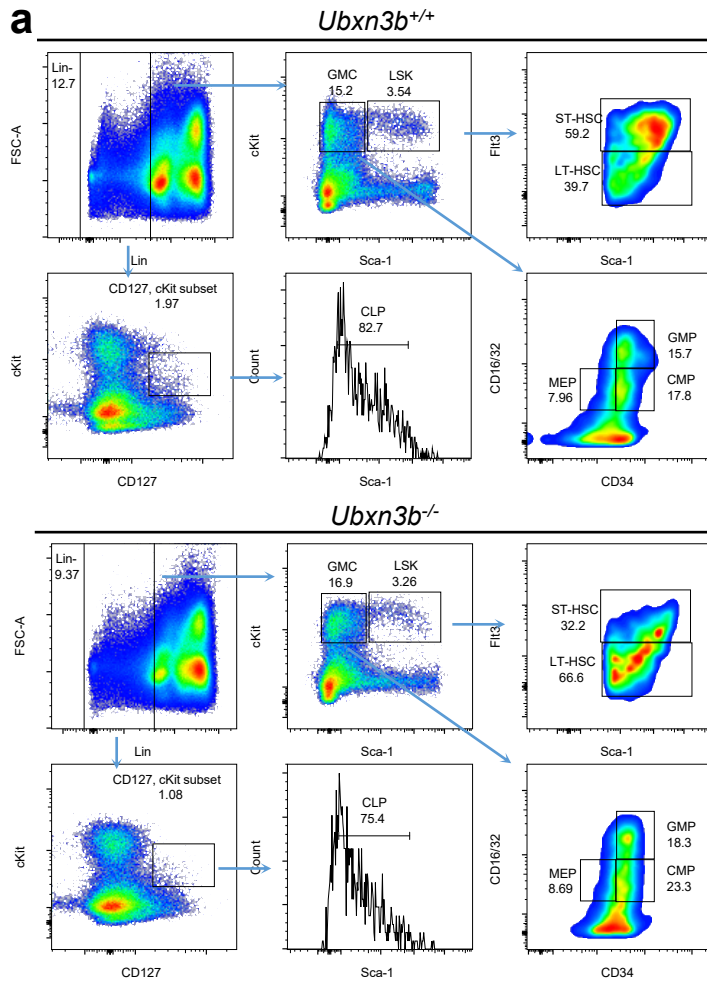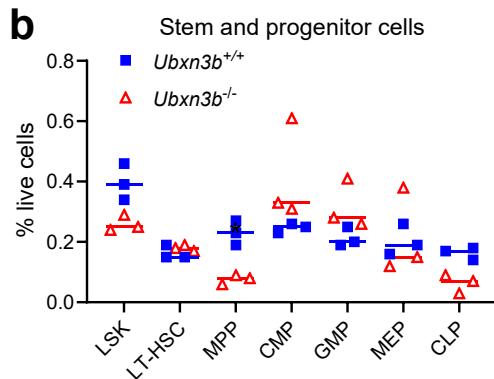

**Supplemental Fig.S5. Bone marrow stem cells and CLPs are modestly reduced in *Ubx3b*<sup>-/-</sup> mice.** **a**) The flow cytometry gating strategy for hematopoietic stem cells (HSC, Lin<sup>-</sup>, Sca1<sup>+</sup> Kit<sup>+</sup>) and lineage progenitors in the bone marrow of *Ubx3b*<sup>+/+</sup> and *Ubx3b*<sup>-/-</sup> littermates. **b**) The percentage of each cell type. Each symbol=one animal. N=3 mice/genotype. The horizontal line indicate the mean of the results. LT-HSC: long-term HSC, MPP: multipotent progenitor, CLP: common lymphoid progenitor, CMP: common myeloid progenitor, GMP: granulocyte-macrophage progenitor, MEP: megakaryocyte-erythrocyte progenitors.

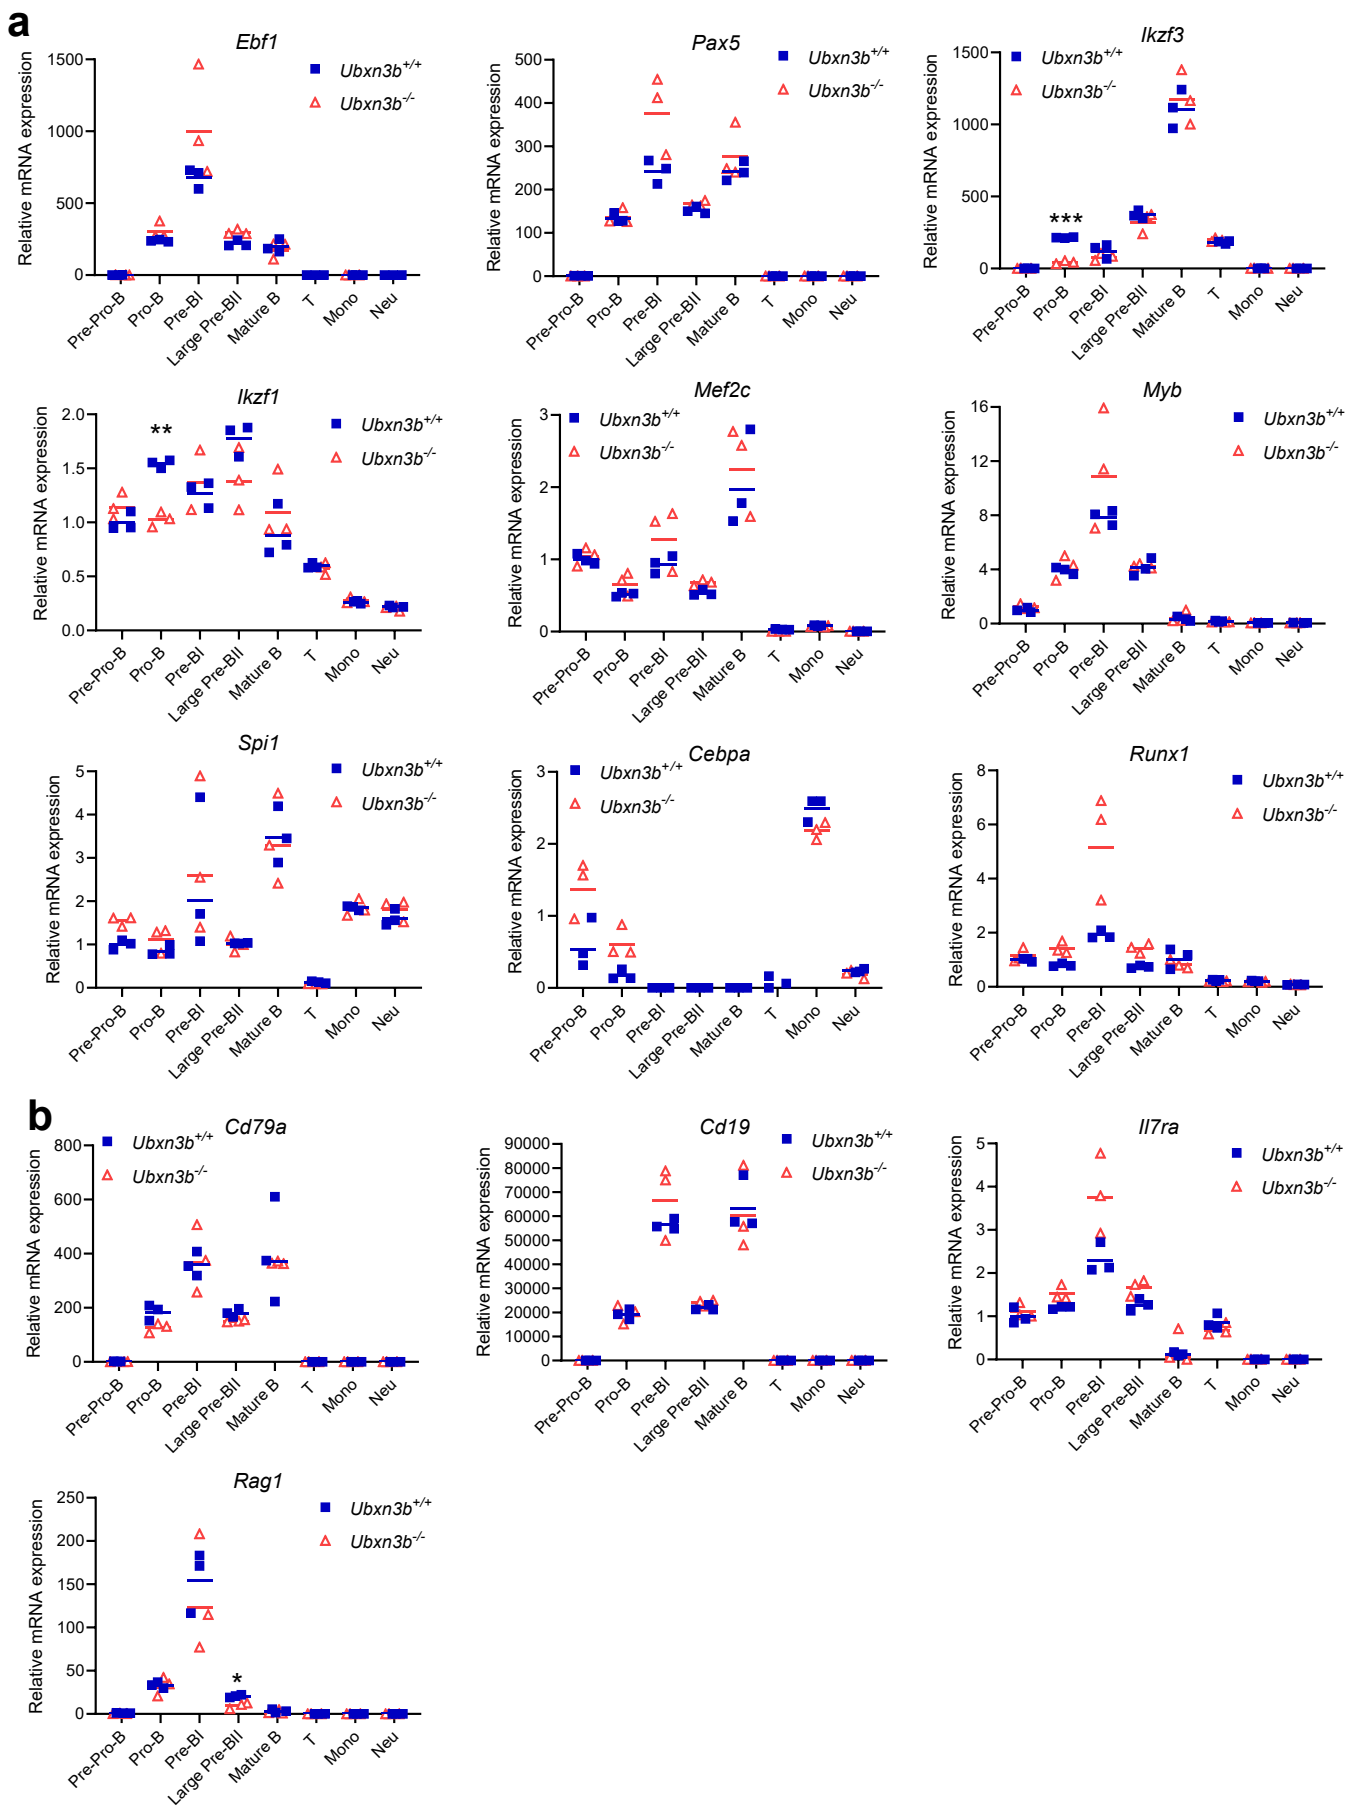

Con 3 min      Anti- $\mu$ H 3 min

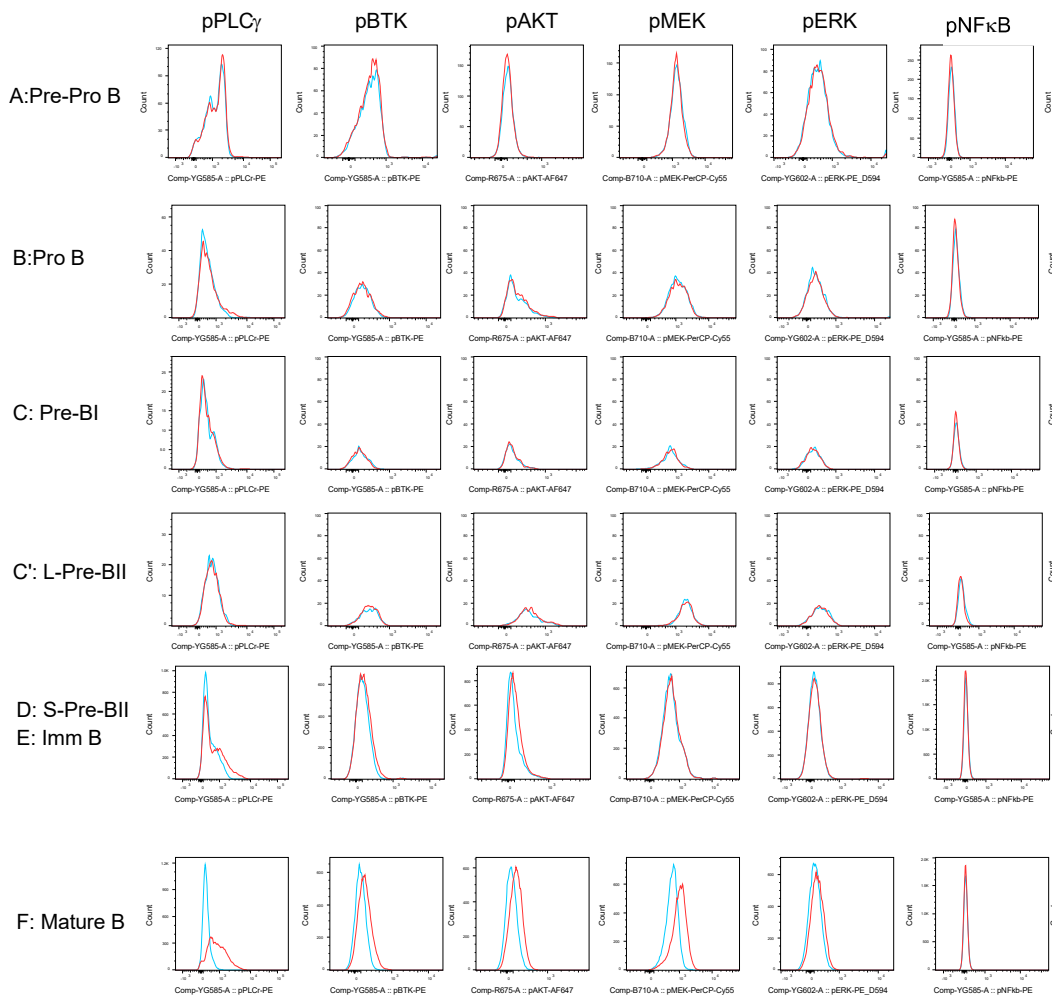

**Supplemental Fig.S7. Cross-linking of BCR by an anti- $\mu$ H antibody stimulates BCR signaling robustly only in mature B cells.** C57/BL6 mouse bone marrow B cells were stimulated with an anti- $\mu$ H antibody or isotype (control) for 3 min, immunostained for the indicated proteins and quantified by flow cytometry. Shown are the histograms of indicated proteins. Y-axis: cell count, X-axis: fluorescence intensity. P denotes phosphorylation.



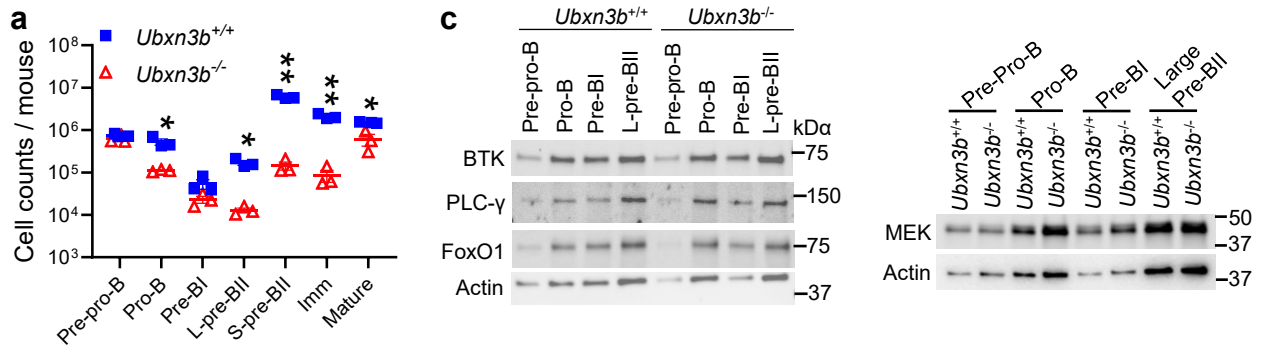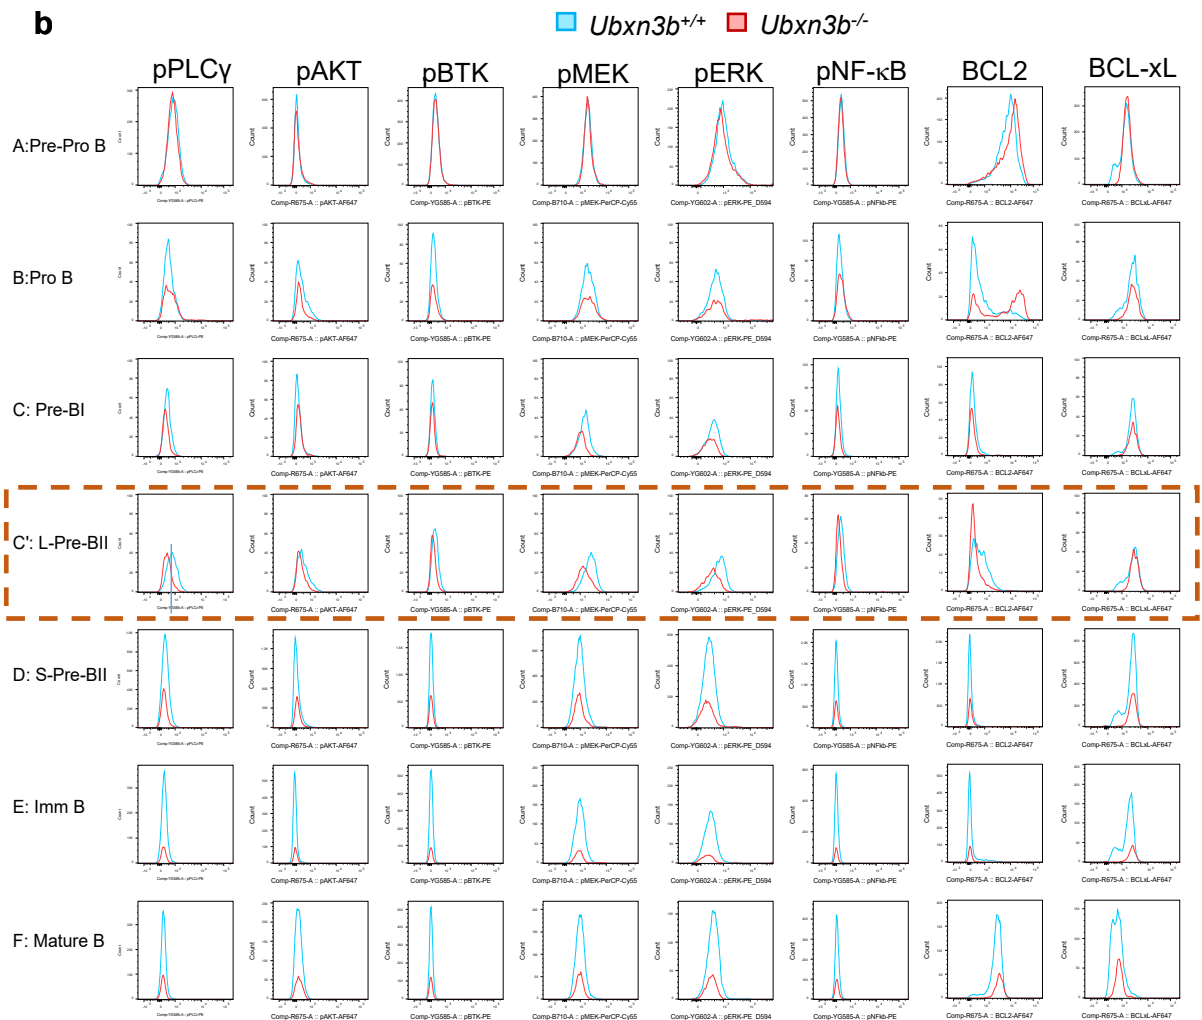

**Supplemental Fig.S8. Constitutive pre-BCR signaling is impaired modestly in pre-BI and significantly in large pre-BII.** ERT2-Cre  $Ubxn3b^{fllox/fllox}$  mice were treated with tamoxifen (TMX) ( $Ubxn3b^{-/-}$ ) or corn oil ( $Ubxn3b^{+/+}$ ) every two days for 8 days. At 5 days after the last dose of TMX, bone marrow B cells were collected for the quantification of **a**) bone marrow B fractions, **b**) indicated phosphorylated proteins by flow cytometry, and **c**) total proteins by immunoblotting. Each symbol=one animal. N=3 mice/genotype. In **a**), the horizontal line indicates the mean of the results. \*  $p < 0.05$ , \*\*  $p < 0.01$  (multiple unpaired Welch  $t$ -tests with Holm-Šídák correction). In **b**), the histograms represent one out of 3 mice. In **c**), the red arrow points to BLNK, the green stars indicate non-specific bands. L: large, S: small. Imm: immature. X-axis: fluorescence intensity, Y-axis: cell count.

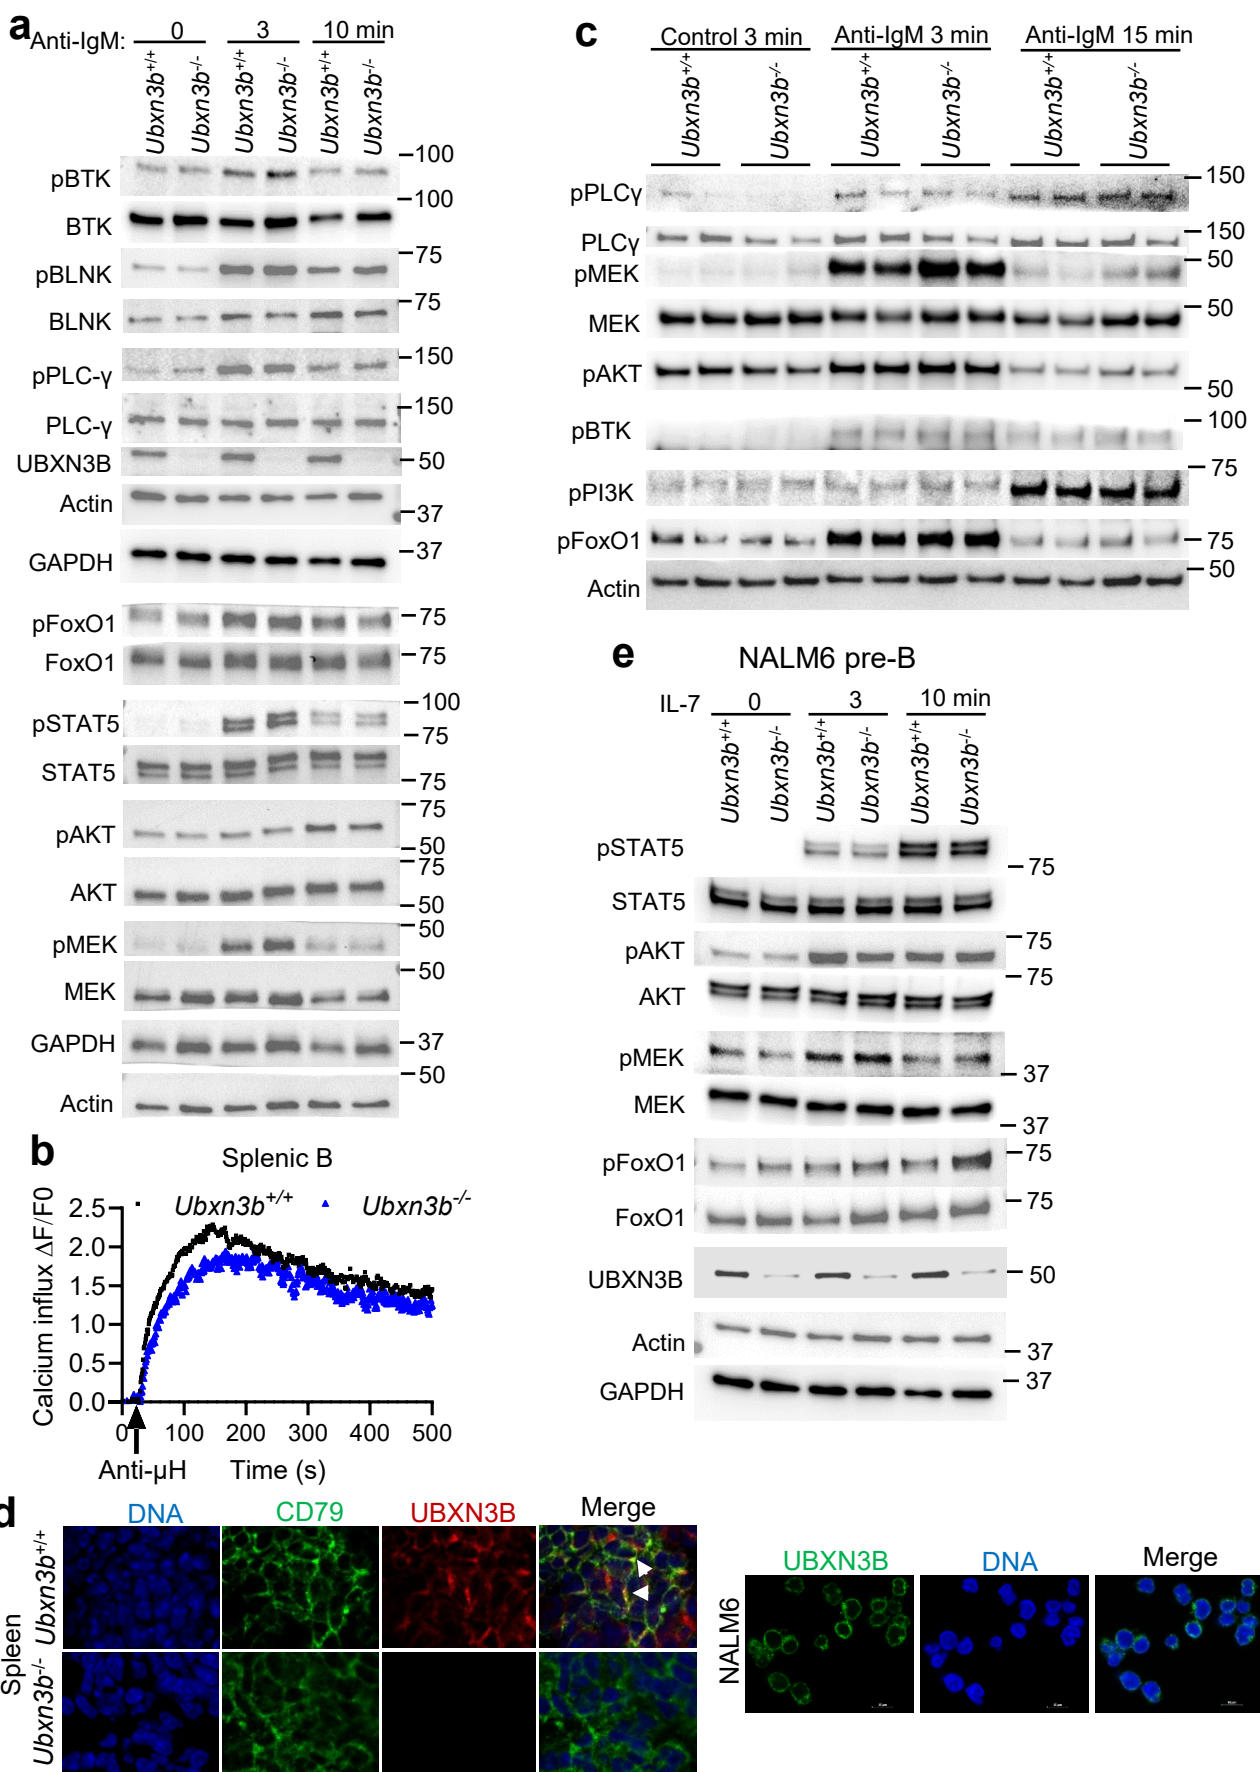

**Supplemental Fig. S9. UBXN3B is dispensable for mature BCR and IL-7R signaling.** **a, b)** ERT-Cre<sup>+</sup> *Ubxn3b<sup>fllox/fllox</sup>* splenocytes were treated *ex vivo* with 4-OH tamoxifen to induce *Ubxn3b* deletion or with solvent, dimethyl sulfoxide. B cells were then purified and stimulated with an anti-human IgM antibody. **a)** The immunoblots of phosphorylated (p) and total proteins. **b)** The ratio of  $\Delta F$  (the difference of calcium load between any a given time after anti-IgM  $\mu$ H treatment and time point zero F0) to F0. **c, d)** Cre<sup>+</sup> *Ubxn3b<sup>fl/fl</sup>* mice were injected with tamoxifen (TMX) (*Ubxn3b<sup>-/-</sup>*) or corn oil (*Ubxn3b<sup>+/+</sup>*) every two days for 8 days. Splenic B cells were purified and stimulated at 5 days after the last dose of TMX. **c)** The immunoblots of indicated proteins from two mice per genotype. **d)** Immunofluorescence staining. **e)** The immunoblots of indicated proteins in NALM6 cells treated with a recombinant human IL-7 protein.

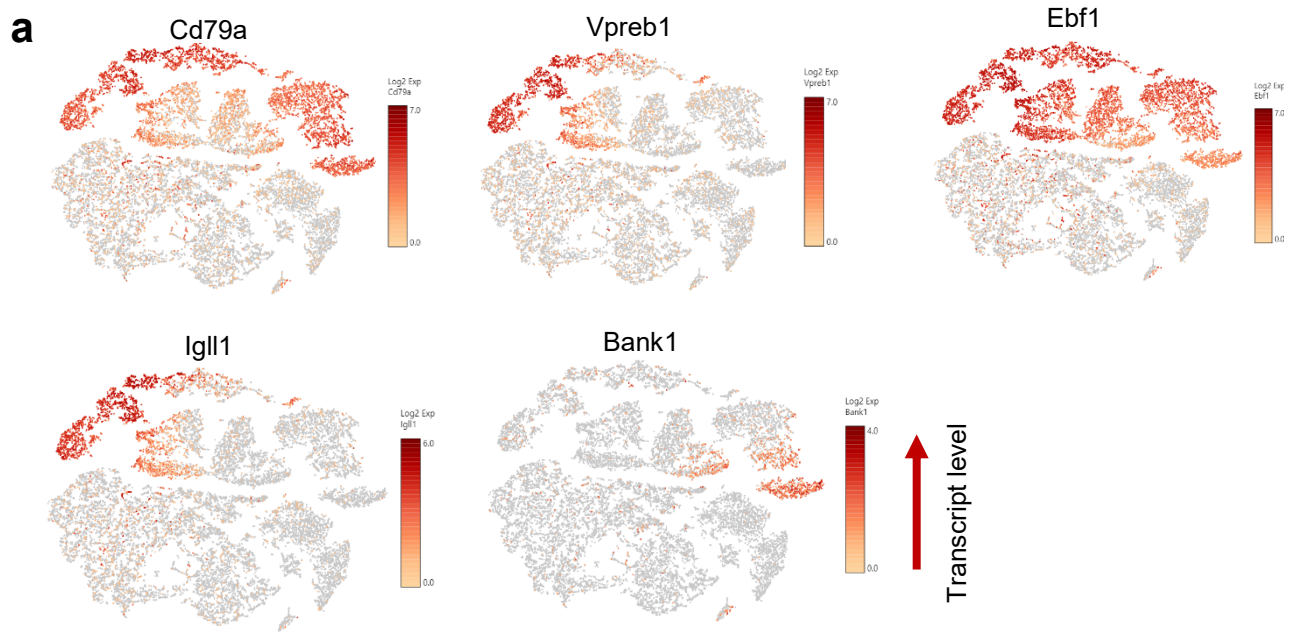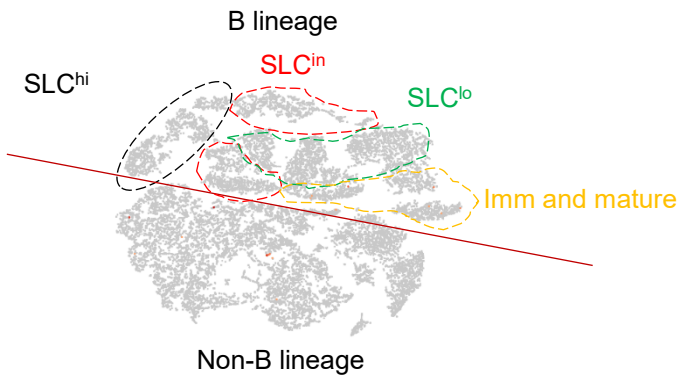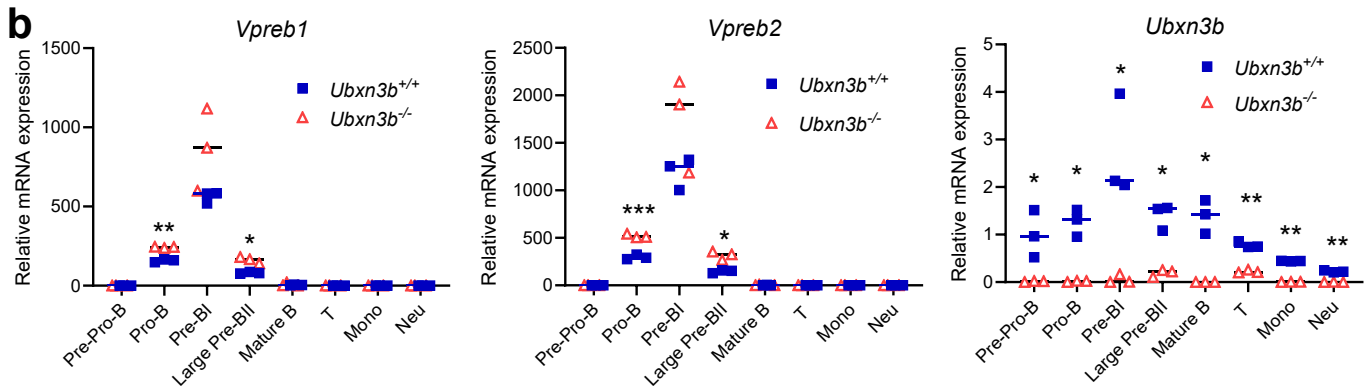

**Supplemental Fig.S10. Clustering of the SLC<sup>hi</sup> B fraction.** Bone marrow B cells were sorted by flow cytometry and transcriptomes were analyzed by scRNA-seq. **a)** The t-distributed stochastic neighbor embedding (t-SNE) of surrogate light chain (SLC) genes, *Vpreb1* and *Igll1*, B cell specific surface marker *Cd79a* and transcription factor *Ebf1* expression. *Bank1* is expressed in immature and mature B. Hi: high, lo: low, in: intermediate SLC expression. **b)** Quantification of the mRNA expression of *Vpreb* and *Ubx3b* by qRT-PCR and normalized to a house keeping gene, *Actb*. Each symbol=one animal. N=3 mice/genotype. The horizontal line indicates the mean of the results. \*,  $p < 0.05$ ; \*\*,  $p < 0.01$ ; \*\*\*,  $p < 0.001$  (multiple unpaired Welch *t*-tests with Holm-Šidák correction).

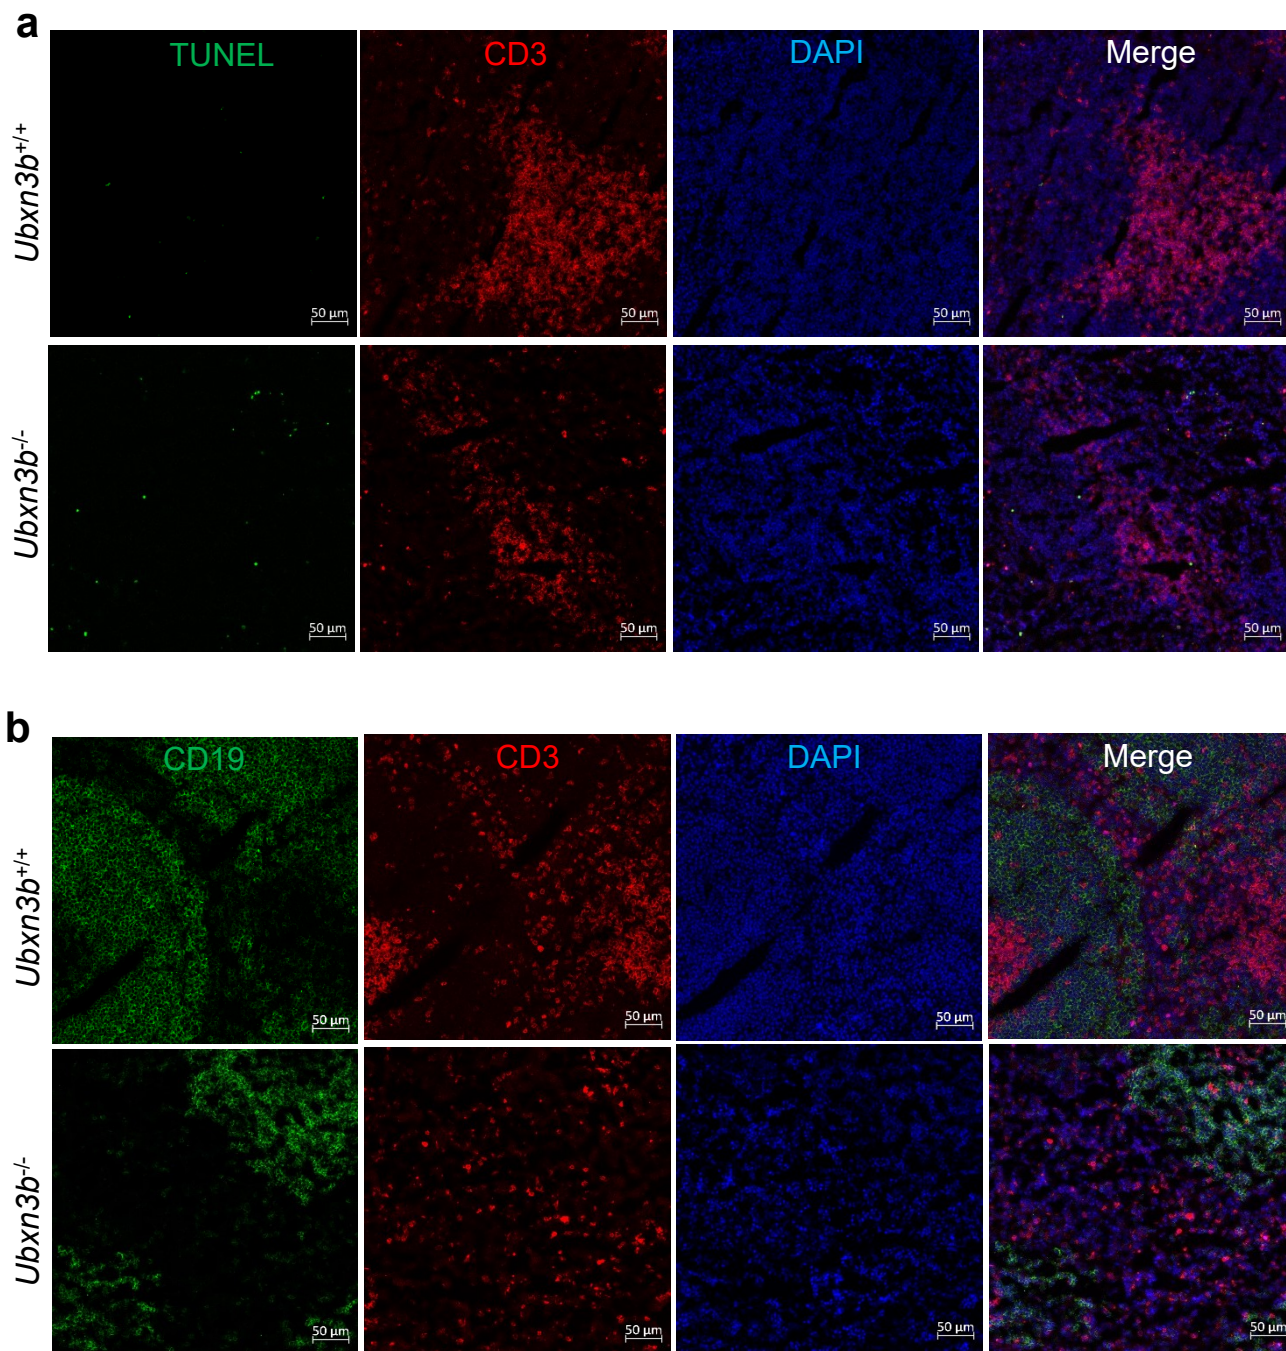

**Supplemental Fig.S11. UB3B is dispensable for peripheral T cell survival.** ERT2-Cre *Ubxn3b<sup>flox/flox</sup>* mice were treated with tamoxifen (TMX) (*Ubxn3b<sup>-/-</sup>*) or corn oil (*Ubxn3b<sup>+/+</sup>*) every two days for 8 days. Shown is the immunofluorescence staining for **a**) apoptotic (TUNEL) and T cells (CD3), **b**) B (CD19) and T cells in the spleen from the at 7 days after the last dose of tamoxifen). DAPI is a counterstain for DNA. Objective: 20x.

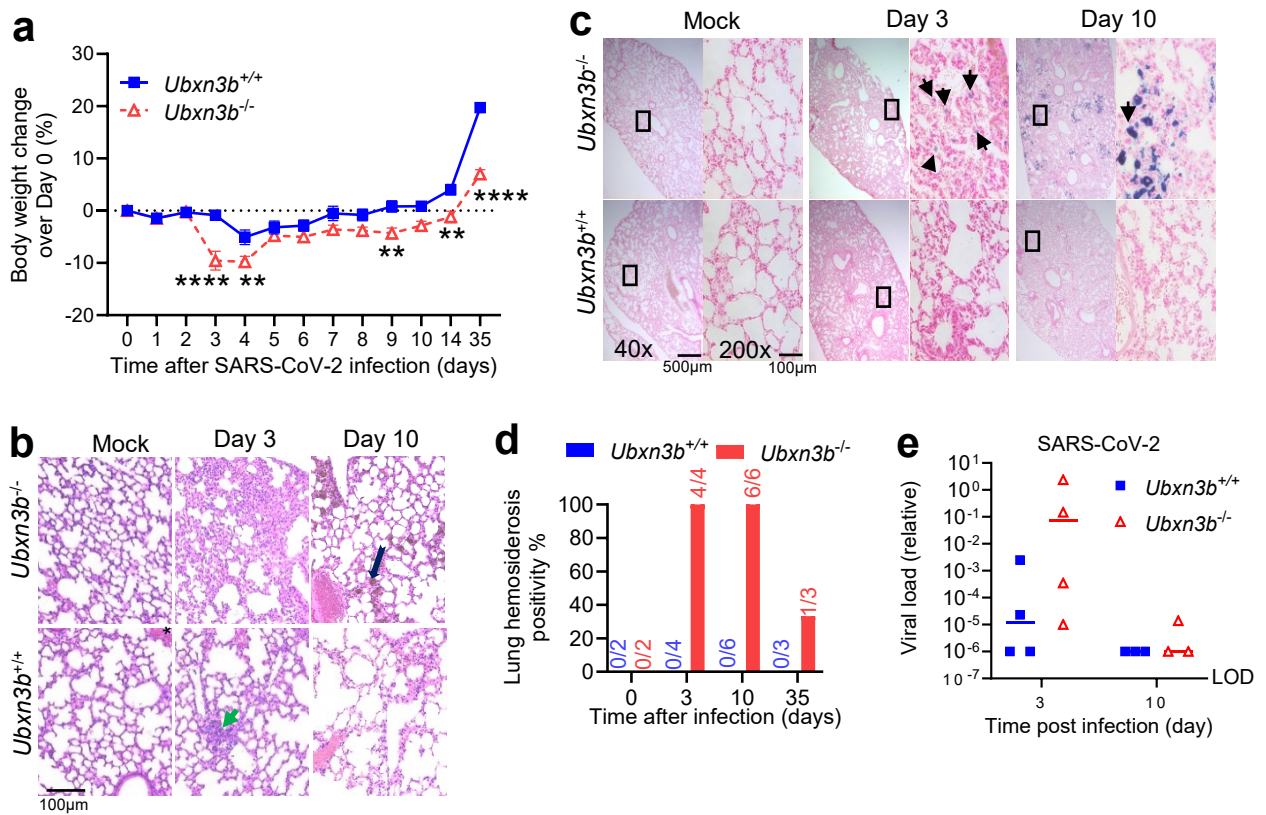

### Supplemental Fig. S12. UBXN3B is essential for controlling SARS-CoV-2 pathogenesis.

ERT2-Cre<sup>+</sup> *Ubxn3b*<sup>fllox/fllox</sup> mice were treated with tamoxifen (TMX) (*Ubxn3b*<sup>-/-</sup>) or corn oil (*Ubxn3b*<sup>+/+</sup>) every two days for 7 days. Three weeks after the first treatment, sex- and age-matched littermates were sensitized with Ad5-hACE2 intranasally for 5 days, then administered 2x10<sup>5</sup> plaque forming units (PFU) of SARS-CoV-2 intranasally. **a**) The percent changes in the body mass of *Ubxn3b*<sup>+/+</sup> and *Ubxn3b*<sup>-/-</sup> littermates over their baseline (day 0). Data point: mean ± SEM, N=6 mice/genotype. **b**) Representative micrographs of hematoxylin and eosin staining (H&E) of lung sections from mock or SARS-CoV-2-infected mice at 3- and 10-days post infection (*p.i.*). The green arrow points to a cluster of immune infiltrates. The blue arrow indicates a cluster of brownish cells of hemosiderosis. Magnification 400 x. **c**) Iron-staining (blue) of lung sections from **b**). N=2 (mock), 4 (Day 3), 7 (Day 10), 3 (Day 35) mice per genotype. **d**) The positivity (%) of iron-positive mice from **c**). **e**) Quantitative RT-PCR (qPCR) quantification of SARS-CoV-2 loads in the lung at days 3 and 10 post infection (*p.i.*). N=4 *Ubxn3b*<sup>+/+</sup> and 3-4 *Ubxn3b*<sup>-/-</sup> mice. Each symbol=one mouse. The horizontal line indicates the median of the results. \*\**p*<0.01, \*\*\*\**p*<0.0001 (repeated measures two-way ANOVA with Bonferroni's multiple comparisons test for **a**).

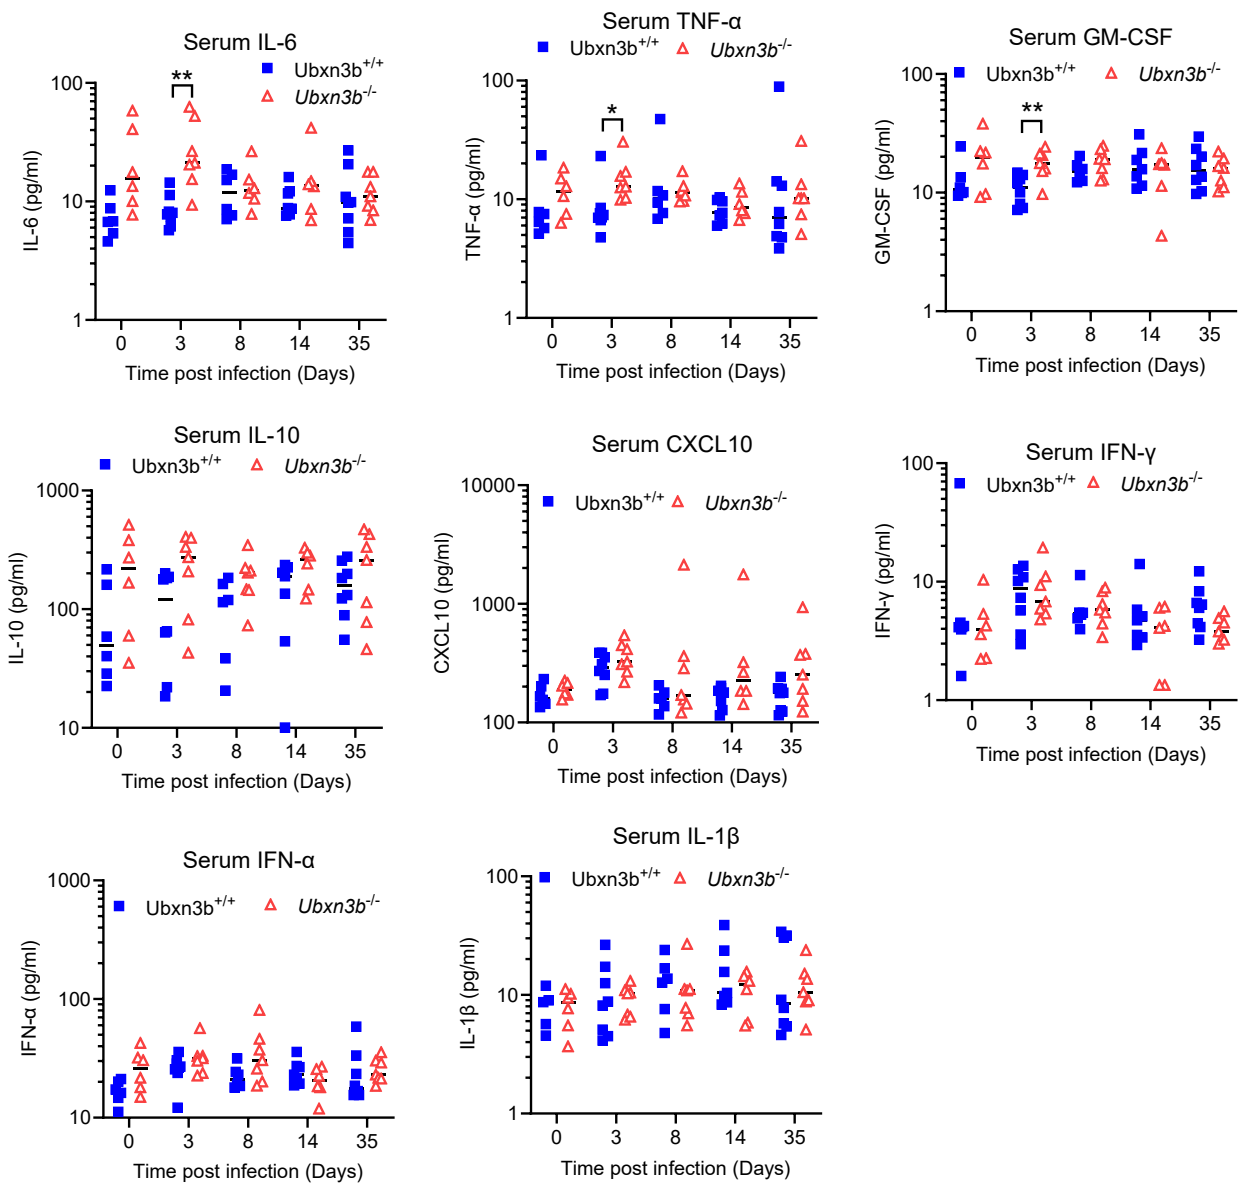

### Supplemental Fig.S13. UBXN3B is essential for controlling SARS-CoV-2 pathogenesis.

ERT2-Cre<sup>+</sup> *Ubxn3b*<sup>flox/flox</sup> mice were treated with tamoxifen (TMX) (*Ubxn3b*<sup>-/-</sup>) or corn oil (*Ubxn3b*<sup>+/+</sup>) every two days for 7 days. Three weeks after the first treatment, sex-and-age matched littermates were administered 2x10<sup>5</sup> plaque forming units (PFU) of SARS-CoV-2 intranasally. Shown is quantification of serum cytokines by a multiplex ELISA. Each symbol= one mouse, N=8 *Ubxn3b*<sup>+/+</sup> and 7 *Ubxn3b*<sup>-/-</sup> mice. The small horizontal line: the median of the result. \*, p<0.05; \*\*, p<0.01 (unpaired multiple Mann-Whitney tests with Holm-Šidák correction) between *Ubxn3b*<sup>+/+</sup> and *Ubxn3b*<sup>-/-</sup> littermates at each time point.

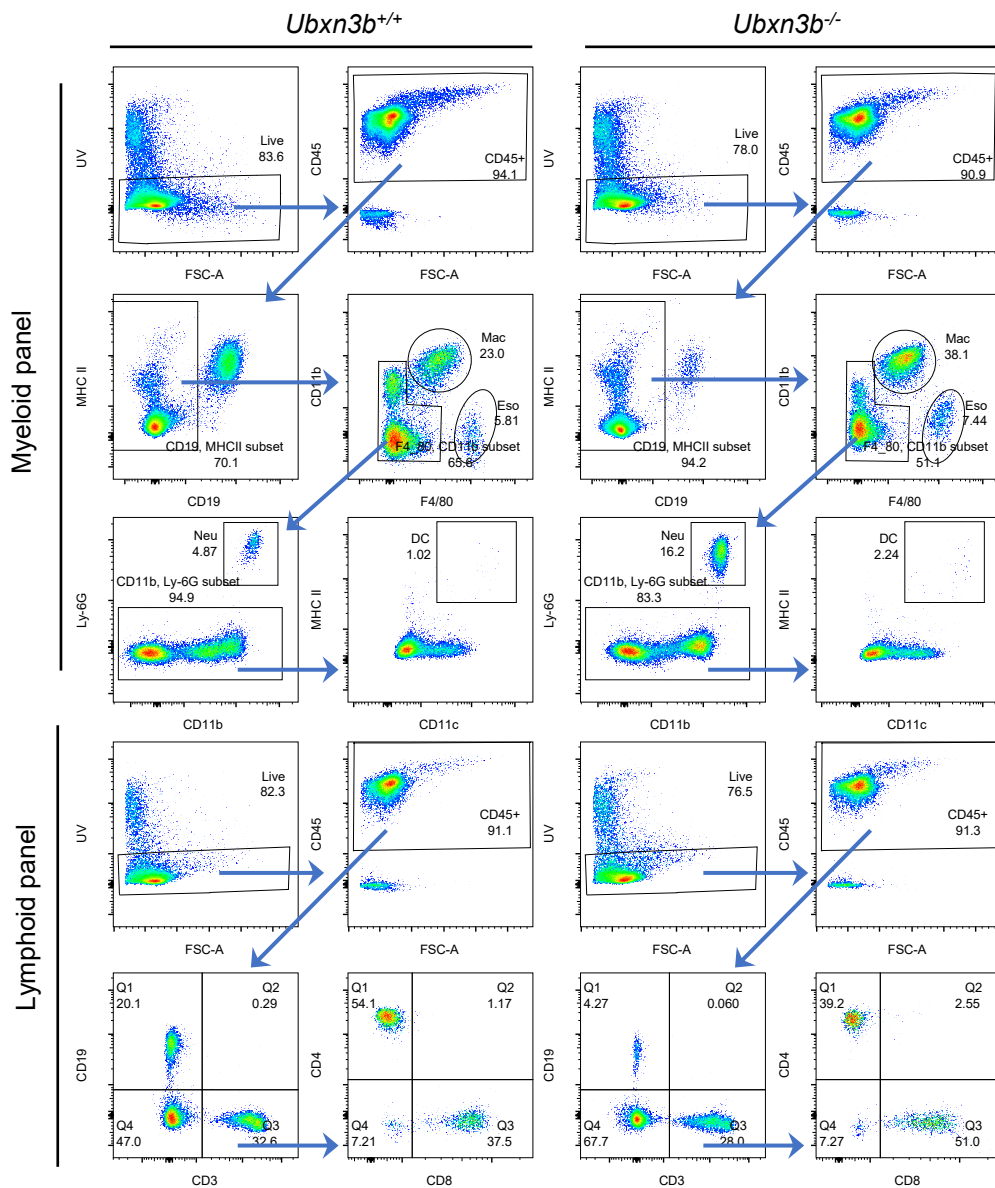

**Supplementary Fig.S14. UBXN3B is required for immune cell homeostasis in the lung during SARS-CoV-2 infection.** ERT2-Cre<sup>+</sup> *Ubxn3b*<sup>flx/flx</sup> mice were treated with tamoxifen (TMX) (*Ubxn3b*<sup>-/-</sup>) or corn oil (*Ubxn3b*<sup>+/+</sup>) every two days for 7 days. Three weeks after the first treatment, sex-and-age matched mice were sensitized with Ad5-hACE2 intranasally for 5 days then administered 2x10<sup>5</sup> plaque forming units (PFU) of SARS-CoV-2 intranasally. Shown are the flow cytometry gating strategy for various immune cell compartments and their percentages in the lung at 35 days after infection.

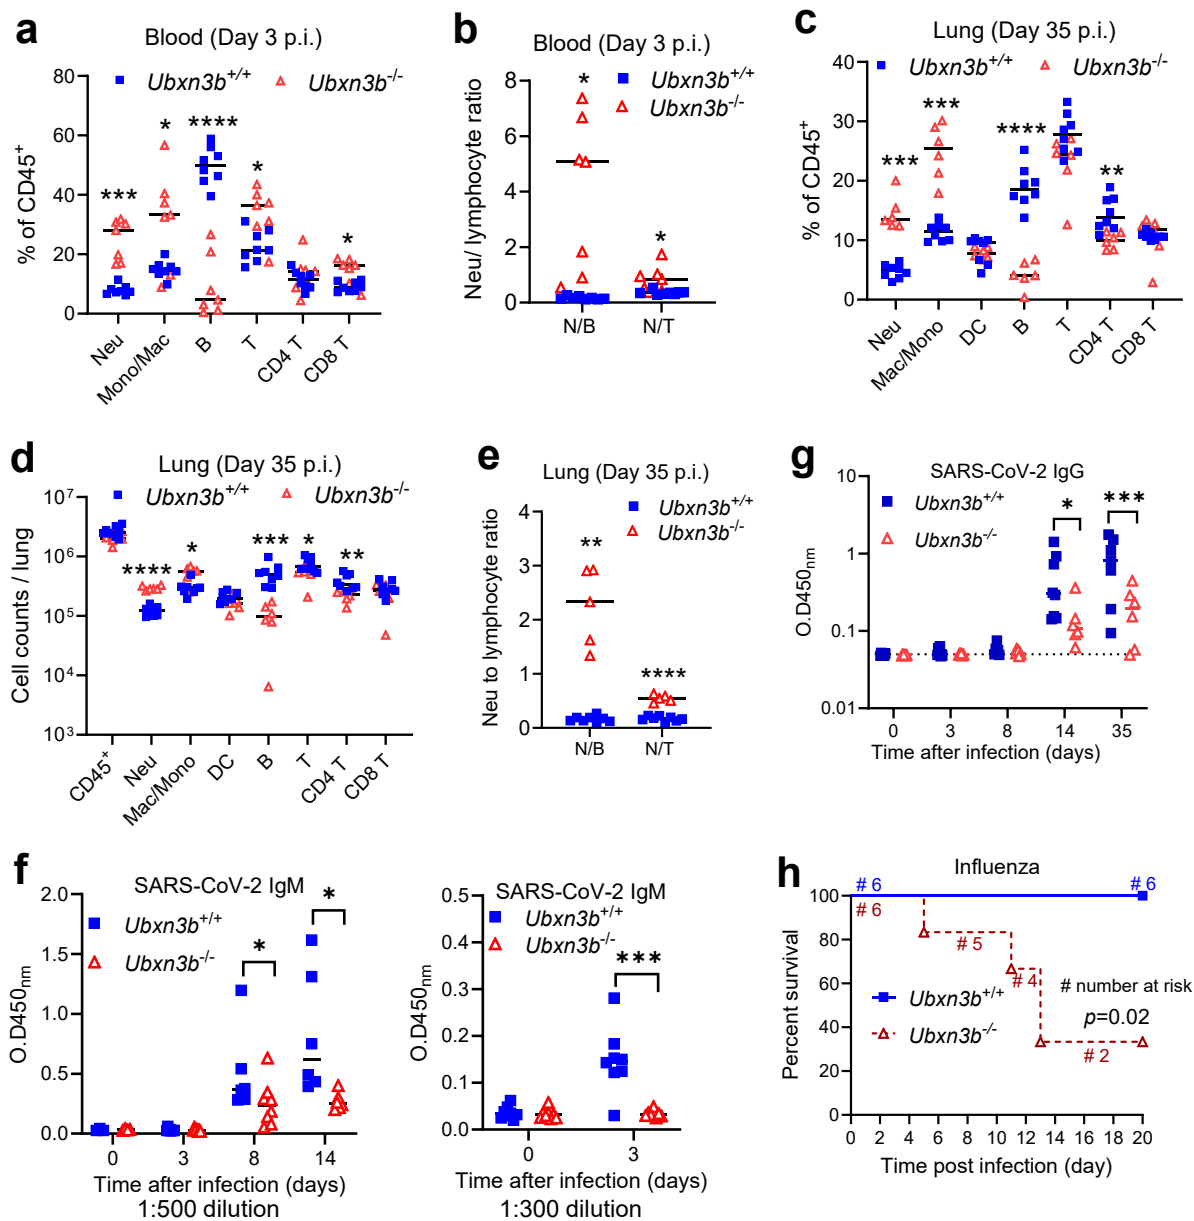

**Supplemental Fig.S15. UBXN3B is essential for controlling SARS-CoV-2 and influenza pathogenesis.** ERT2-Cre<sup>+</sup> *Ubxn3b*<sup>flx/flx</sup> mice were treated with tamoxifen (TMX) (*Ubxn3b*<sup>-/-</sup>) or corn oil (*Ubxn3b*<sup>+/+</sup>) every two days for 7 days. **a-g**) Three weeks after the first treatment, sex- and age-matched littermates were sensitized with Ad5-hACE2 intranasally for 5 days, then administered 2x10<sup>5</sup> plaque forming units (PFU) of SARS-CoV-2 intranasally. **a**) The percentage (relative to CD45<sup>+</sup> cells) and **b**) neutrophil-to-T/B cell ratio (N/B, N/T) at 3 days *p.i.* The **c**) percentage, **d**) cell counts of various immune cell compartments, and **e**) the neutrophil-to-B/T ratios, in the lungs at 35 days *p.i.* The concentrations of serum **f**) IgM and **g**) IgG against SARS-CoV-2 Spike as presented as optical density (OD) at  $\lambda_{450\text{nm}}$ . In **a, b**) N=8 *Ubxn3b*<sup>+/+</sup> and 7 *Ubxn3b*<sup>-/-</sup>. In **c-e**) N=8 *Ubxn3b*<sup>+/+</sup> and 6 *Ubxn3b*<sup>-/-</sup>. In **f**) N for Day 0=3/3, Day 3=8/7, Day 8=6/7, Day 14=6/6 *Ubxn3b*<sup>+/+</sup> / *Ubxn3b*<sup>-/-</sup> mice respectively. In **g**) N for Day 0=6/6, Day 3=8/7, Day 8=6/7, Day 14=8/6, Day 35=7/6. Neu: neutrophil, Mac/Mono: macrophage/monocyte, DC: dendritic cell. Each symbol=one mouse. The horizontal line indicates the median of the results. \**p*<0.05, \*\**p*<0.01, \*\*\**p*<0.001, \*\*\*\**p*<0.0001 [unpaired multiple Welch *t*-test with Holm-Šidák correction for **a-e**), mixed effect model with Bonferroni's multiple comparisons test for **f** and **g**) respectively]. **h**) After the tamoxifen/oil treatment, sex- and age-matched littermates were infected with 350 CCID<sub>50</sub> (cell culture infectious dose 50% assay) influenza A PR/8/34 H1N1 intranasally. Mice were monitored daily from Day 1 through 20 post infection (*p.i.*). Shown are the survival curves with the subject number at risk. N=6 mice per genotype, *p*=0.02 (Log-Rank test).
